# Supplementary material for: Neurological Prognostic Factors in Hospitalized Patients with COVID-19
Source: MDPI journal article supplement (doi:10.3390/brainsci12020193), 2022-01-30
Supplement: s1 [file s1]

**Table S1.** Patients' characteristics according to the severity of neurological symptoms and signs (NSS)

|                                       |                       | High-risk NSS |             |         | Low-risk NSS |              |         | High-risk / or absence of low-risk NSS |              |         |
|---------------------------------------|-----------------------|---------------|-------------|---------|--------------|--------------|---------|----------------------------------------|--------------|---------|
|                                       | All patients<br>n=349 | No<br>n=272   | Yes<br>n=77 | P-value | No<br>n= 103 | Yes<br>n=246 | P-value | No<br>n= 210                           | Yes<br>n=117 | P-value |
| Demographics                          |                       |               |             |         |              |              |         |                                        |              |         |
| Age (years)                           | 64 (51-77)            | 61 (49-71)    | 76 (66-84)  | <0.001  | 70 (57-79)   | 61 (49-73)   | 0.008   | 60 (49-69)                             | 71 (57-80)   | <0.001  |
| Age >65 years, n (%)                  | 167 (47.85)           | 102 (38.06)   | 62 (80.52)  | <0.001  | 47 (57.32)   | 102 (41.46)  | 0.012   | 74 (32.54)                             | 74 (63.25)   | <0.001  |
| Female sex, n (%)                     | 191 (54.72)           | 150 (55.97)   | 39 (50.65)  | 0.408   | 41 (50.00)   | 141 (57.32)  | 0.248   | 119 (56.67)                            | 62 (52.99)   | 0.521   |
| Comorbidities and treatment           |                       |               |             |         |              |              |         |                                        |              |         |
| Hypertension, n (%)                   | 209 (59.89)           | 148 (55.22)   | 58 (73.52)  | 0.002   | 57 (69.51)   | 137 (55.69)  | 0.027   | 112 (53.33)                            | 81 (69.23)   | 0.005   |
| Obesity, n (%)                        | 65 (18.62)            | 51 (19.03)    | 14 (18.18)  | 0.866   | 13 (15.85)   | 50 (20.33)   | 0.373   | 42 (20.00)                             | 21 (17.95)   | 0.652   |
| Smoking, n (%)                        | 54 (15.47)            | 38 (14.23)    | 15 (19.48)  | 0.261   | 16 (19.51)   | 32 (13.01)   | 0.149   | 29 (13.81)                             | 19 (16.24)   | 0.551   |
| Diabetes mellitus, n (%)              | 90 (25.79)            | 59 (22.01)    | 31 (40.26)  | 0.001   | 25 (30.49)   | 57 (23.17)   | 0.185   | 42 (20.00)                             | 40 (34.19)   | 0.005   |
| Ischemic heart disease, n (%)         | 59 (16.91)            | 36 (13.43)    | 22 (28.57)  | 0.002   | 19 (23.17)   | 36 (14.63)   | 0.073   | 25 (11.90)                             | 39 (25.64)   | 0.002   |
| Prior CNS disease. n (%)              | 77 (22.06)            | 56 (17.72)    | 21 (63.64)  | <0.001  | 25 (30.49)   | 33 (13.41)   | <0.001  | 21 (10.00)                             | 36 (30.77)   | <0.001  |
| Asthma / COPD, n (%)                  | 20 (5.73)             | 15 (5.60)     | 3 (3.90)    | 0.554   | 1 (1.22)     | 18 (7.32)    | 0.041   | 14 (6.67)                              | 4 (3.42)     | 0.312   |
| Neoplasm, n (%)                       | 40 (11.46)            | 31 (11.57)    | 9 (11.69)   | 0.976   | 12 (14.63)   | 25 (10.16)   | 0.268   | 23 (10.95)                             | 14 (11.97)   | 0.782   |
| Chronic kidney disease stage 3, n (%) | 17 (4.87)             | 14 (5.22)     | 3 (3.90)    | 0.635   | 3 (3.66)     | 13 (5.28)    | 0.553   | 11 (5.24)                              | 5 (4.27)     | 0.698   |
| Immunosuppressive treatment, n (%)    | 18 (5.16)             | 14 (5.22)     | 4 (5.19)    | 0.991   | 3 (3.66)     | 14 (5.69)    | 0.472   | 12 (5.71)                              | 5 (4.27)     | 0.573   |
| First COVID-19 symptoms               |                       |               |             |         |              |              |         |                                        |              |         |
| Fever, n (%)                          | 207 (59.31)           | 167 (62.31)   | 39 (50.65)  | 0.066   | 40 (48.78)   | 155 (63.01)  | 0.024   | 139 (66.19)                            | 56 (47.86)   | 0.001   |

|                                             |             |             |            |        |            |             |        |             |            |        |
|---------------------------------------------|-------------|-------------|------------|--------|------------|-------------|--------|-------------|------------|--------|
| Cough, n (%)                                | 219 (62.75) | 177 (66.04) | 42 (54.55) | 0.065  | 45 (54.88) | 165 (67.07) | 0.047  | 146 (69.52) | 64 (54.70) | 0.008  |
| Sore throat, n (%)                          | 44 (12.61)  | 40 (13.93)  | 4 (5.19)   | 0.024  | 5 (6.10)   | 37 (15.04)  | 0.036  | 35 (16.67)  | 7 (5.98)   | 0.006  |
| Loss of appetite, n (%)                     | 105 (30.09) | 97 (27.79)  | 6 (7.80)   | <0.001 | 9 (10.98)  | 95 (38.62)  | <0.001 | 91 (43.33)  | 12 (10.26) | <0.001 |
| Dyspnea, n (%)                              | 178 (51.00) | 132 (49.25) | 44 (57.14) | 0.222  | 29 (35.37) | 133 (54.07) | 0.034  | 111 (52.86) | 51 (43.59) | 0.108  |
| Abdominal pain, n (%)                       | 67 (19.20)  | 55 (20.52)  | 11 (14.29) | 0.220  | 7 (8.54)   | 58 (23.58)  | 0.003  | 51 (24.29)  | 13 (11.11) | 0.004  |
| Neurological symptoms and signs             |             |             |            |        |            |             |        |             |            |        |
| Headache, n (%)                             | 130 (37.24) | 117 (44.15) | 13 (20.63) | <0.001 | 0 (0.00)   | 130 (52.85) | <0.001 | 117 (55.71) | 13 (11.11) | <0.001 |
| Dizziness, n (%)                            | 78 (22.35)  | 78 (24.91)  | 12 (19.05) | 0.326  | 0 (0.00)   | 78 (31.71)  | <0.001 | 66 (31.43)  | 12 (10.26) | <0.001 |
| Decreased mood, n (%)                       | 44 (41.26)  | 122 (46.04) | 21 (33.87) | 0.082  | 0 (0.00)   | 144 (58.54) | <0.001 | 122 (58.10) | 21 (17.95) | <0.001 |
| Memory or concentration difficulties, n (%) | 57 (16.33)  | 35 (13.21)  | 21 (33.33) | <0.001 | 9 (10.98)  | 47 (19.11)  | 0.901  | 31 (14.76)  | 24 (20.51) | 0.183  |
| Fatigue, n (%)                              | 200 (57.31) | 175 (66.04) | 24 (38.71) | <0.001 | 0 (0.00)   | 200 (81.30) | <0.001 | 75 (83.33)  | 24 (20.51) | <0.001 |
| Visual disturbances, n (%)                  | 26 (7.45)   | 22 (8.30)   | 4 (6.45)   | 0.678  | 4 (4.88)   | 22 (8.94)   | 0.238  | 19 (9.05)   | 7 (5.98)   | 0.326  |
| Decreased level of consciousness, n (%)     | 57 (16.33)  | 0 (0.00)    | 56 (72.73) | <0.001 | 19 (23.17) | 23 (9.39)   | 0.012  | 0 (0.00)    | 42 (35.90) | <0.001 |
| Delirium, n (%)                             | 24 (6.88)   | 0 (0.0)     | 24 (31.17) | <0.001 | 8 (9.76)   | 10 (4.08)   | 0.052  | 0 (0.00)    | 18 (15.38) | <0.001 |
| Seizures, n (%)                             | 8 (2.30)    | 0 (0.0)     | 8 (10.39)  | <0.001 | 4 (4.88)   | 2 (0.82)    | 0.037  | 0 (0.00)    | 6 (5.1)    | 0.002  |
| Ataxia, n (%)                               | 6 (1.72)    | 5 (1.87)    | 1 (1.41)   | 0.792  | 2 (2.44)   | 4 (1.63)    | 0.638  | 3 (1.43)    | 3 (2.56)   | 0.671  |
| Involuntary movements, n (%)                | 16 (4.58)   | 5 (1.87)    | 9 (11.69)  | <0.001 | 4 (4.88)   | 9 (3.67)    | 0.628  | 3 (1.43)    | 10 (8.55)  | 0.003  |
| Stroke / TIA symptoms, n (%)                | 35 (10.03)  | 0 (0.00)    | 35 (45.45) | 0.003  | 14 (17.07) | 18 (7.32)   | 0.010  | 0 (0.00)    | 32 (27.35) | <0.001 |
| Anosmia, n (%)                              | 73 (20.92)  | 68 (25.66)  | 5 (8.06)   | 0.013  | 6 (7.32)   | 67 (27.24)  | <0.001 | 62 (29.52)  | 11 (9.40)  | <0.001 |
| Ageusia, n (%)                              | 89 (25.50)  | 80 (30.19)  | 9 (14.52)  | 0.126  | 10 (12.20) | 79 (32.11)  | <0.001 | 72 (34.29)  | 17 (14.53) | <0.001 |
| Muscle weakness, n (%)                      | 160 (45.85) | 129 (48.31) | 30 (47.62) | 0.921  | 19 (23.17) | 138 (56.10) | <0.001 | 115 (54.76) | 41 (35.04) | <0.001 |

|                                   |                   |                   |                    |        |                    |                   |        |                   |                    |        |
|-----------------------------------|-------------------|-------------------|--------------------|--------|--------------------|-------------------|--------|-------------------|--------------------|--------|
| Myalgia, n (%)                    | 122 (34.96)       | 102 (38.49)       | 19 (30.65)         | 0.249  | 10 (12.20)         | 112 (45.53)       | <0.001 | 96 (45.71)        | 25 (21.37)         | <0.001 |
| Paresthesia, n (%)                | 64 (18.34)        | 52 (19.62)        | 11 (17.74)         | 0.736  | 6 (7.32)           | 58 (23.58)        | 0.001  | 50 (23.81)        | 13 (11.11)         | 0.005  |
| Diarrhea, n (%)                   | 92 (26.36)        | 73 (27.24)        | 18 (23.68)         | 0.535  | 14 (17.07)         | 76 (30.89)        | 0.015  | 67 (31.90)        | 22 (18.80)         | 0.010  |
| Increased sweating                | 115 (32.95)       | 102 (38.49)       | 12 (18.18)         | 0.002  | 7 (8.54)           | 108 (43.90)       | <0.001 | 96 (45.71)        | 18 (15.38)         | <0.001 |
| Blood pressure <90/60 mmHg, n (%) | 66 (18.91)        | 30 (11.19)        | 35 (45.45)         | <0.001 | 13 (15.85)         | 40 (16.26)        | 0.931  | 29 (13.81)        | 24 (20.51)         | 0.115  |
| Heart rate >100/min, n (%)        | 105 (30.09)       | 72 (26.87)        | 3 (40.26)          | 0.024  | 20 (24.39)         | 73 (29.67)        | 0.358  | 59 (28.10)        | 34 (29.06)         | 0.852  |
| Hospital admission                |                   |                   |                    |        |                    |                   |        |                   |                    |        |
| Oxygen therapy, n (%)             |                   |                   |                    |        |                    |                   |        |                   |                    |        |
| Not required                      | 131 (37.53)       | 119 (44.57)       | 9 (11.69)          |        | 30 (37.04)         | 98 (39.84)        |        | 94 (44.76)        | 34 (29.31)         |        |
| Nasal cannula                     | 150 (42.50)       | 117 (43.82)       | 32 (41.56)         | <0.001 | 34 (41.98)         | 110 (44.72)       | 0.849  | 92 (43.81)        | 51 (43.97)         | 0.003  |
| Non-re-breather mask              | 65 (18.62)        | 28 (10.48)        | 36 (46.75)         |        | 15 (18.51)         | 34 (13.82)        |        | 22 (10.48)        | 30 (25.87)         |        |
| Non-invasive ventilation          | 3 (0.86)          | 3 (1.12)          | 0 (0.00)           |        | 1 (1.23)           | 2 (0.81)          |        | 2 (0.95)          | 1 (0.86)           |        |
| MEWS score, n (%)                 |                   |                   |                    |        |                    |                   |        |                   |                    |        |
| 0-2                               | 330 (95.10)       | 261 (97.39)       | 65 (86.67)         | <0.001 | 78 (95.12)         | 236 (96.33)       | 0.628  | 204 (97.14)       | 109 (93.97)        | 0.160  |
| ≥3                                | 17 (4.90)         | 7 (2.61)          | 10 (13.33)         |        | 4 (4.88)           | 9 (3.67)          |        | 6 (2.86)          | 7 (6.03)           |        |
| Laboratory tests                  |                   |                   |                    |        |                    |                   |        |                   |                    |        |
| Troponin I (mg/dL)                | 6.39 (3.24-16.41) | 5.00 (2.72-11.88) | 13.98 (5.80-33.47) | <0.001 | 10.18 (4.53-21.94) | 5.46 (2.79-12.94) | 0.001  | 5.00 (2.51-10.08) | 10.45 (5.00-23.45) | <0.001 |
| D-dimer (mg/L)                    | 0.72 (0.44-1.48)  | 0.63 (0.41-1.23)  | 1.45 (0.72-3.23)   | <0.001 | 1.00 (0.43-1.82)   | 0.66 (0.43-1.27)  | 0.042  | 0.61 (0.41-1.07)  | 1.01 (0.46-2.21)   | <0.001 |

Values are presented as n (%), mean ± standard deviation, or median (interquartile range). COPD denotes chronic obstructive pulmonary disease; CNS, central nervous system; MEWS, Modified Early Warning Score; NSS, neurological symptoms or signs; TIA, transient ischemic

attack. High-risk NSS include decreased level of consciousness, delirium, seizures, stroke symptoms or transient ischemic attack. Low-risk NSS comprise headache, dizziness, decreased mood, and fatigue.

**Table S2.** Diagnostic accuracy for predicting in-hospital deaths or oxygen therapy

| Diagnostic accuracy for the prediction of in-hospital mortality      |                     |          |             |             |       |       |       |
|----------------------------------------------------------------------|---------------------|----------|-------------|-------------|-------|-------|-------|
|                                                                      | AUC, 95% CI         | Accuracy | Sensitivity | Specificity | PPV   | NPV   | LR    |
| High-risk neurological symptom or sign                               | 0.756 (0.659-0.853) | 0.812    | 0.688       | 0.824       | 0.286 | 0.963 | 3.913 |
| Low-risk neurological symptom or sign                                | 0.697 (0.572-0.822) | 0.765    | 0.619       | 0.775       | 0.159 | 0.967 | 2.754 |
| High-risk / or absence of low-risk neurological symptoms or signs    | 0.741 (0.638-0.845) | 0.682    | 0.810       | 0.673       | 0.145 | 0.981 | 2.477 |
| Diagnostic accuracy for the prediction of in-hospital oxygen therapy |                     |          |             |             |       |       |       |
|                                                                      | AUC, 95% CI         | Accuracy | Sensitivity | Specificity | PPV   | NPV   | LR    |
| High-risk neurological symptom or sign                               | 0.630 (0.572-0.689) | 0.555    | 0.322       | 0.938       | 0.896 | 0.457 | 5.24  |
| Low-risk neurological symptom or sign                                | 0.520 (0.457-0.584) | 0.468    | 0.264       | 0.777       | 0.642 | 0.411 | 1.18  |
| High-risk / or absence of low-risk neurological symptoms or signs    | 0.585 (0.522-0.645) | 0.601    | 0.423       | 0.746       | 0.716 | 0.462 | 1.67  |

For abbreviations, see Tables 1-2. LR denotes likelihood ratio test; PPV, positive predictive value; NPV, negative predictive value.

**Table S3.** Multivariable regression analysis for death with stroke / TIA symptoms

|                                  | Univariable analysis |         | Multivariable analysis |         |
|----------------------------------|----------------------|---------|------------------------|---------|
|                                  | OR (95% CI)          | P-value | OR (95% CI)            | P-value |
| Age, decades                     | 2.08 (1.51-2.86)     | <0.001  | 1.78 (1.18-2.69)       | 0.006   |
| Prior CNS disease                | 8.13 (3.78-17.47)    | <0.001  | 7.29 (2.72-19.59)      | <0.001  |
| Diabetes mellitus                | 2.33 (1.11-4.86)     | 0.025   | -                      | -       |
| Chronic kidney disease stage 3   | 4.52 (1.49-13.76)    | 0.008   | -                      | -       |
| Neoplasm                         | 3.49 (1.47-8.08)     | 0.004   | 3.96 (1.32-11.83)      | 0.014   |
| Stroke / TIA symptoms            | 5.06 (2.17-11.81)    | <0.001  | 2.59 (0.78-8.65)       | 0.122   |
| MEWS score (per point)           | 2.08 (1.51-2.88)     | <0.001  | 2.25 (1.49-3.38)       | <0.001  |
| Troponin I (log)                 | 1.60 (1.25-2.05)     | 0.002   | -                      | -       |
| D-dimer (log)                    | 1.70 (1.26-2.28)     | <0.001  | -                      | -       |
| AIC                              |                      |         | 133.65                 |         |
| The Wald test, (df), P-value     |                      |         | 34.98, (4), <0.001     |         |
| AUC (95% CI)                     |                      |         | 0.90 (0.86-0.94)       |         |
| The Hosmer–Lemeshow test P-value |                      |         | 0.924                  |         |

AIC denotes Akaike information criterion; AUC, the area under the receiver operating characteristic curve, CI, 95% confidence intervals; CNS, central nervous system; (df) degree of freedom; MEWS, Modified Early Warning Score; OR Odds Ratio, TIA, transient ischemic attack.

**Table S4.** Multivariable regression analysis for oxygen therapy with stroke / TIA symptoms

|                                  | Univariable analysis |         | Multivariable analysis |         |
|----------------------------------|----------------------|---------|------------------------|---------|
|                                  | OR (95% CI)          | P-value | OR (95% CI)            | P-value |
| Age, decades                     | 1.41 (1.2-1.62)      | <0.001  | 1.34 (1.12-1.59)       | 0.001   |
| Female sex                       | 0.51 (0.33-0.79)     | 0.003   | 0.51 (0.29-0.89)       | 0.019   |
| Prior CNS disease                | 2.56 (1.42-4.62)     | 0.002   | -                      | -       |
| Hypertension                     | 1.96 (1.26-3.06)     | 0.003   | -                      | -       |
| Diabetes mellitus                | 1.69 (1.01-2.84)     | 0.048   | -                      | -       |
| Neoplasm                         | 3.74 (1.52-9.18)     | 0.004   | 3.11 (1.07-9.00)       | 0.037   |
| Stroke or TIA symptoms           | 3.21 (1.30-7.97)     | 0.012   | 2.09 (0.74-5.93)       | 0.164   |
| MEWS score                       | 5.01 (3.09-8.14)     | <0.001  | 5.64 (3.17-10.07)      | <0.001  |
| Troponin I (log)                 | 1.55 (1.26-1.92)     | <0.001  | -                      | -       |
| AIC                              |                      |         | 311.73                 |         |
| The Wald test, (df), P-value     |                      |         | 49.29, (4), <0.001     |         |
| AUC (95% CI)                     |                      |         | 0.80 (0.75-0.85)       |         |
| The Hosmer–Lemeshow test P-value |                      |         | 0.077                  |         |

For abbreviations, see Table S3.

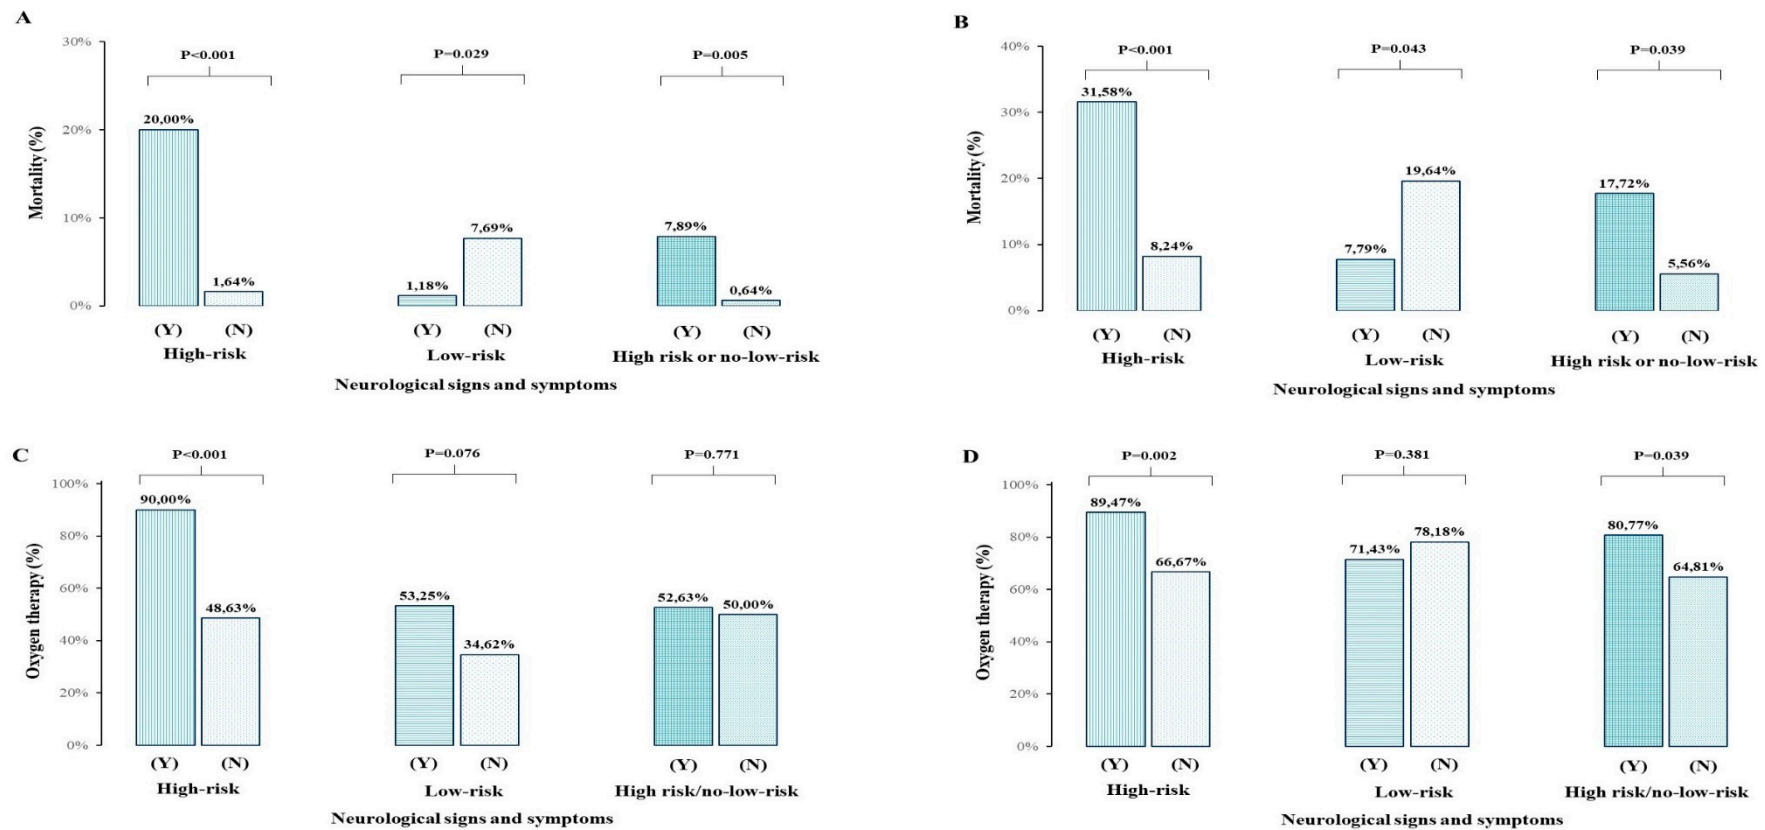

**Figure S1.** Mortality rates and requirement for oxygen therapy in COVID-19 patients according to the severity of neurological symptoms and signs and methods of data collection (A, C – prospective; B, D – retrospective).

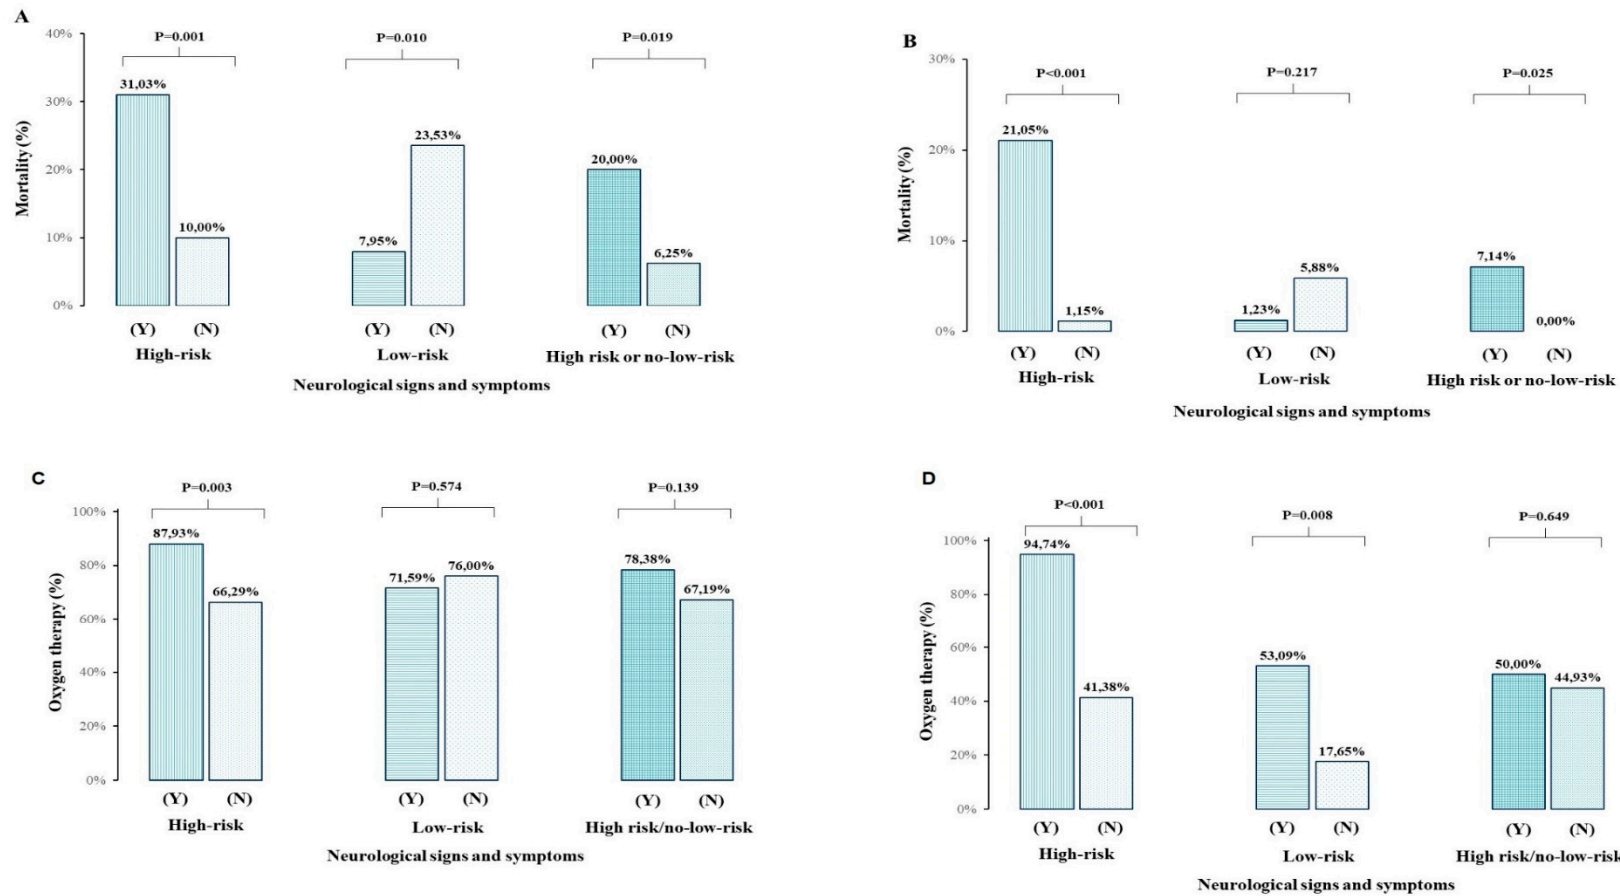

**Figure S2.** Mortality rates and requirement for oxygen therapy in COVID-19 patients according to the severity of neurological symptoms and signs (NSS) and hospital department (A, C – Neurology; B, D – Metabolic Diseases and Diabetology). As there were no deaths and high-risk

NSS in the departments of Internal Medicine, Otorhinolaryngology and Infectious Diseases, patients hospitalized at these departments were not taken into account during analysis.
